# Supplementary material for: Octogenarian newly diagnosed multiple myeloma patients without geriatric impairments: the role of age >80 in the IMWG frailty score
Source: PubMed Central journal article supplement (PMC8041817; doi:10.1038/s41408-021-00464-w), 2021-04-12
Supplement: 41408_2021_464_MOESM1_ESM.pdf [file 41408_2021_464_MOESM1_ESM.pdf]

**Octogenarian Newly Diagnosed Multiple Myeloma Patients Without Geriatric Impairments: The Role of Age >80 in the IMWG Frailty Score**

## **SUPPLEMENTARY APPENDIX**

- **Table S1.** Treatment received by Frail\_by\_age and Frail\_by\_other patients
- **Table S2.** Treatment discontinuation details
- **Figure S1.** PFS (A) and PFS2 (B) of Frail\_by\_age vs. Frail\_by\_other patients. No\_frail patients are shown as reference.
- **Figure S2.** Time to protocol discontinuation (end of treatment) of Frail\_by\_age vs. Frail\_by\_other patients. No\_frail patients are shown as reference.
- **Figure S3.** Cumulative incidence of grade  $\geq 3$  non-hematologic (A) and hematologic (B) adverse events
- **Figure S4.** OS of patients aged  $\leq 80$  years (A) and  $> 80$  years (B) according to the presence or absence of geriatric impairments

**Table S1.** Treatment received by Frail\_by\_age and Frail\_by\_other patients

| <b>Treatment</b> | <b>Frail_by_age<br/>N=70 (%)</b> | <b>Frail_by_other<br/>N=190 (%)</b> |
|------------------|----------------------------------|-------------------------------------|
| <b>CCD</b>       | 2 (3)                            | 8 (4)                               |
| <b>CPR</b>       | 12 (17)                          | 42 (22)                             |
| <b>MPR</b>       | 16 (23)                          | 33 (17)                             |
| <b>Rd</b>        | 20 (29)                          | 45 (24)                             |
| <b>VMP</b>       | 6 (9)                            | 19 (10)                             |
| <b>VCP</b>       | 3 (4)                            | 16 (8)                              |
| <b>VP</b>        | 11 (16)                          | 27(14)                              |

**Abbreviations.** CCD, carfilzomib-cyclophosphamide-dexamethasone; CPR, cyclophosphamide-prednisone-lenalidomide; MPR, melphalan-prednisone-lenalidomide; Rd, lenalidomide-low-dose dexamethasone; VMP, bortezomib-melphalan-prednisone; VCP, bortezomib-cyclophosphamide-prednisone; VP, bortezomib-low-dose prednisone.

**Table S2.** Treatment discontinuation details

| <b>Discontinuation</b>     | <b>Frail_by_age<br/>N=70 (%)</b> | <b>Frail_by_other<br/>N=190 (%)</b> | <b>No_frail<br/>N=609 (%)</b> |
|----------------------------|----------------------------------|-------------------------------------|-------------------------------|
| <b>Adverse event</b>       | 42 (60)                          | 88 (46)                             | 215 (35)                      |
| Hematologic                | 5 (7)                            | 8 (4)                               | 27 (4)                        |
| Dermatologic               | 4 (6)                            | 2 (1)                               | 22 (4)                        |
| Infections                 | 3 (4)                            | 12 (6)                              | 12 (2)                        |
| Cardiac                    | 3 (4)                            | 8 (4)                               | 13 (2)                        |
| Neurologic                 | 2 (3)                            | 4 (2)                               | 10 (2)                        |
| <b>Progressive disease</b> | 23 (33)                          | 91 (48)                             | 313 (51)                      |
| <b>Other</b>               | 5 (7)                            | 11 (6)                              | 81 (13)                       |

**Figure S1.** PFS (A) and PFS2 (B) of Frail\_by\_age vs. Frail\_by\_other patients. No\_frail patients are shown as reference.

**A. PFS**

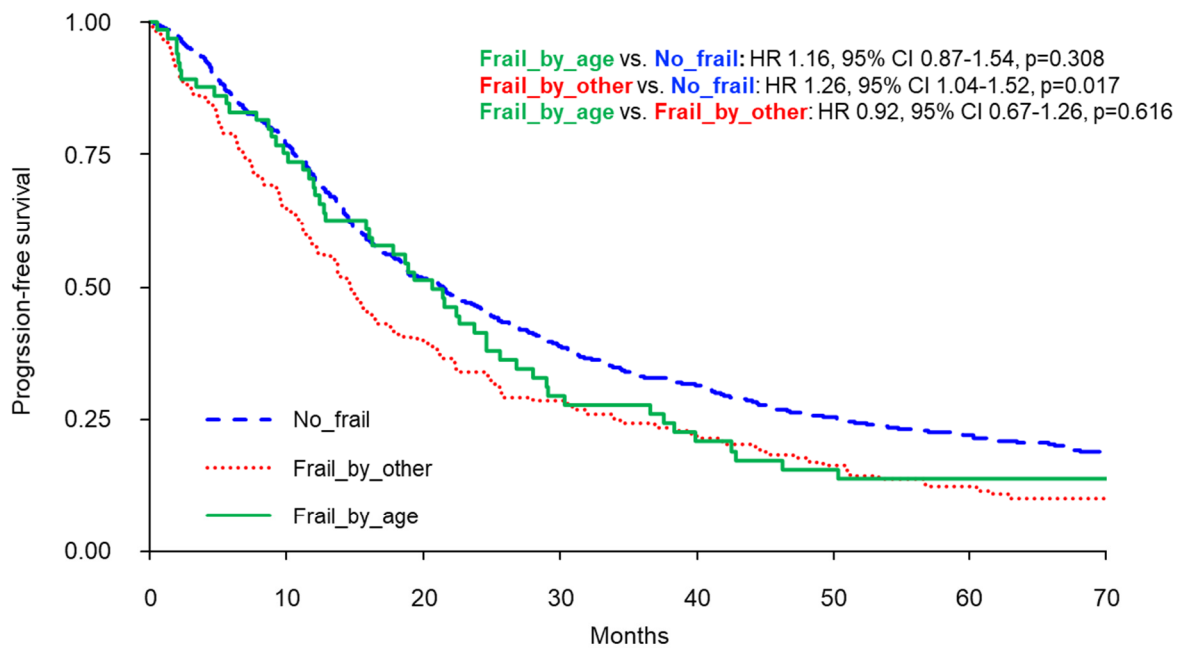

|                |     |     |     |                |     |     |     |    |
|----------------|-----|-----|-----|----------------|-----|-----|-----|----|
| No_frail       | 609 | 452 | 301 | 224            | 179 | 141 | 112 | 61 |
| Frail_by_other | 190 | 114 | 68  | 46             | 34  | 25  | 17  | 9  |
| Frail_by_age   | 70  | 48  | 31  | 17             | 12  | 9   | 8   | 4  |
|                |     |     |     | Number at risk |     |     |     |    |

**B. PFS2**

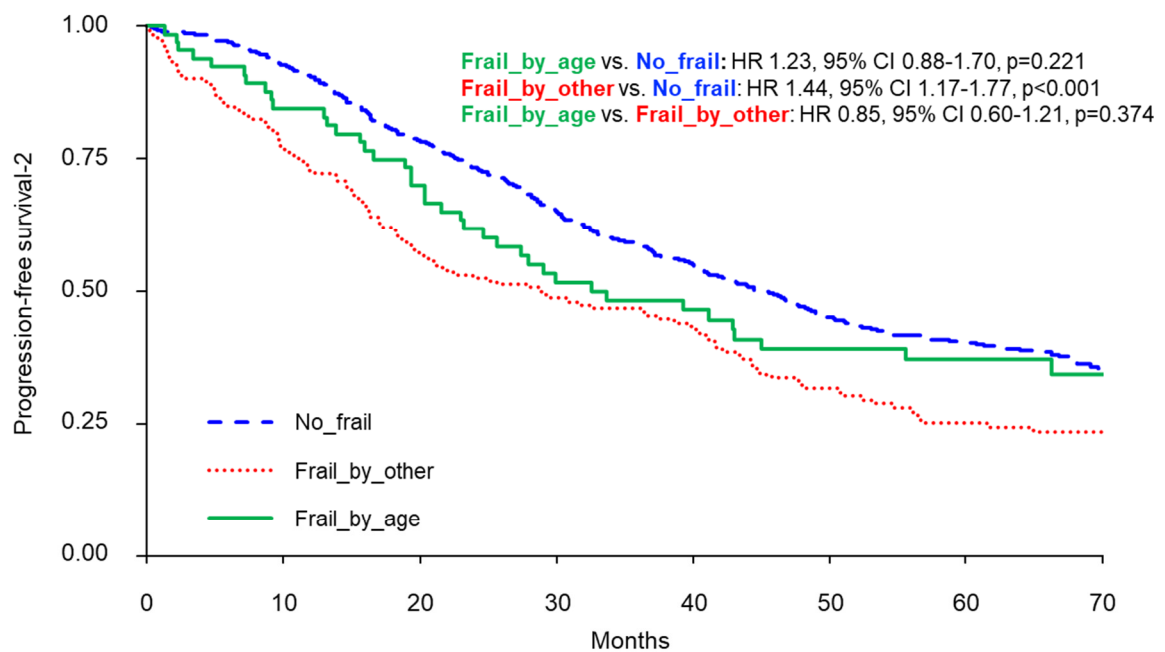

|                |     |     |     |                |     |     |     |     |
|----------------|-----|-----|-----|----------------|-----|-----|-----|-----|
| No_frail       | 609 | 541 | 452 | 367            | 304 | 241 | 199 | 108 |
| Frail_by_other | 190 | 135 | 95  | 75             | 65  | 45  | 32  | 17  |
| Frail_by_age   | 70  | 54  | 42  | 30             | 25  | 20  | 19  | 7   |
|                |     |     |     | Number at risk |     |     |     |     |

**Abbreviations.** PFS, progression-free survival; PFS2, progression-free survival-2; HR, hazard ratio; CI, confidence interval; p, p-value.

**Figure S2.** Time to protocol discontinuation (end of treatment) of Frail\_by\_age vs. Frail\_by\_other patients. No\_frail patients are shown as reference.

### End of treatment

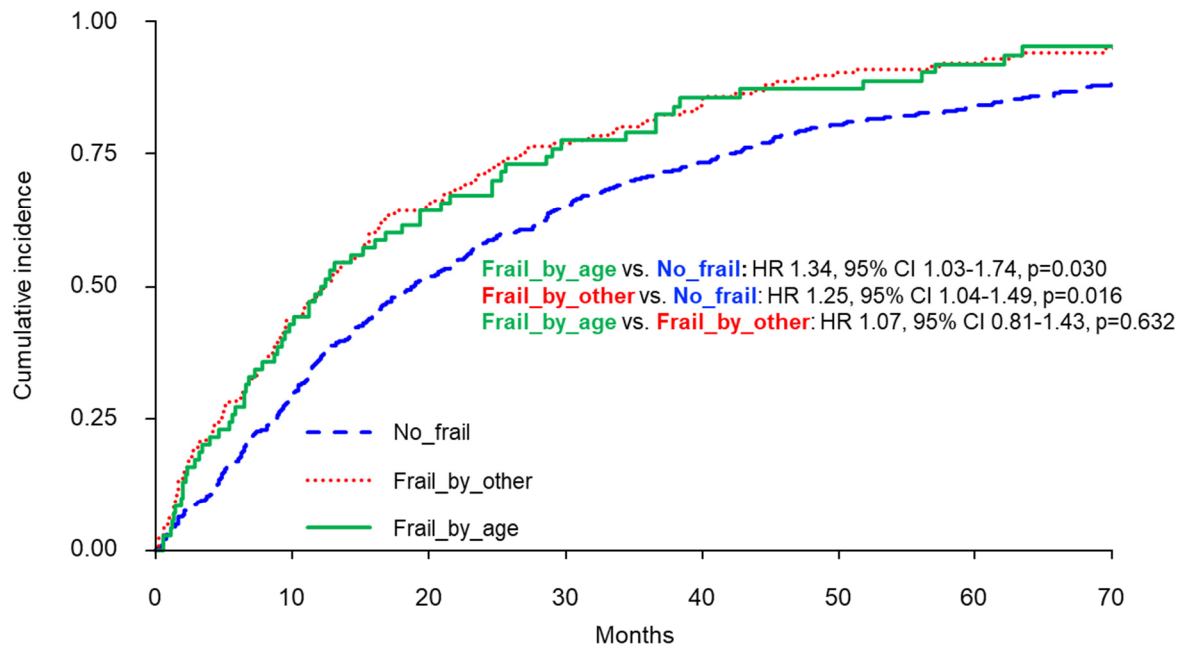

|                |                |     |     |     |     |     |    |    |
|----------------|----------------|-----|-----|-----|-----|-----|----|----|
| No_frail       | 609            | 431 | 291 | 203 | 147 | 104 | 81 | 44 |
| Frail_by_other | 190            | 107 | 65  | 42  | 28  | 17  | 12 | 7  |
| Frail_by_age   | 70             | 40  | 25  | 15  | 9   | 8   | 5  | 2  |
|                | Number at risk |     |     |     |     |     |    |    |

Abbreviations. HR, hazard ratio; CI, confidence interval; p, p-value.

**Figure S3.** Cumulative incidence of grade  $\geq 3$  non-hematologic (A) and hematologic (B) adverse events

**A. Grade  $\geq 3$  non-hematologic adverse events**

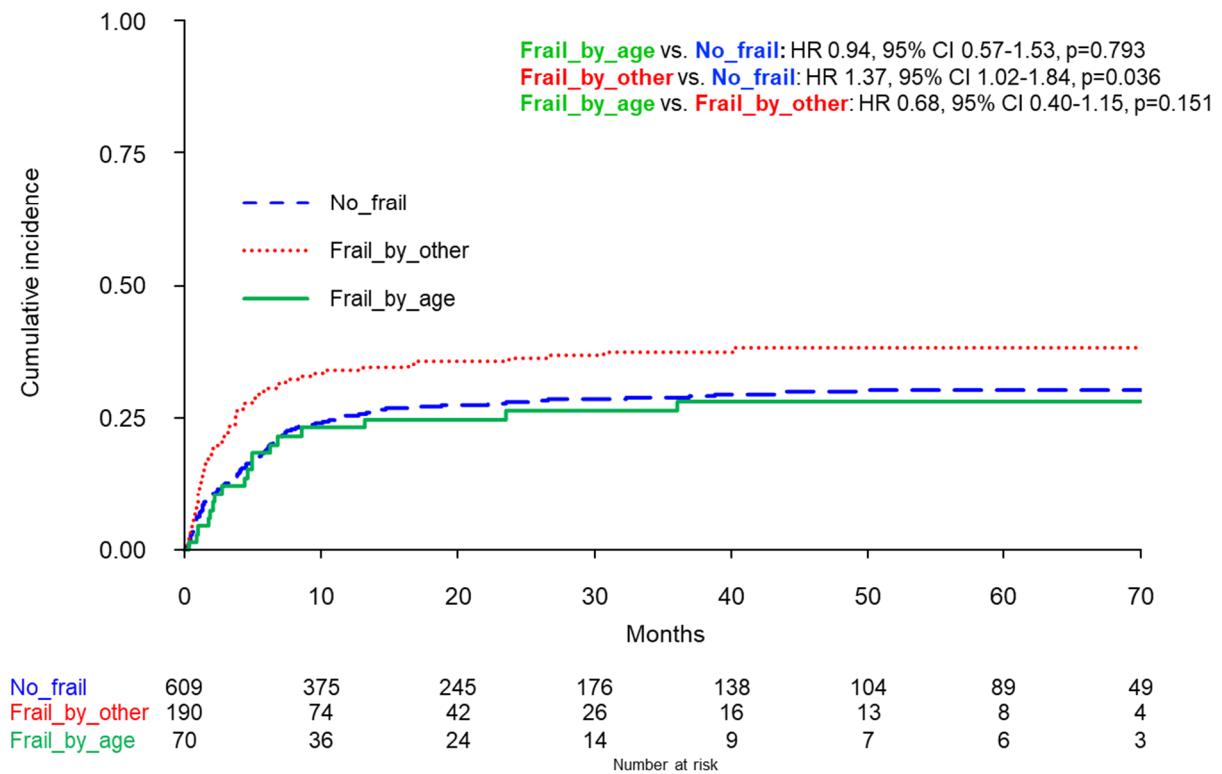

**B. Grade  $\geq 3$  hematologic adverse events**

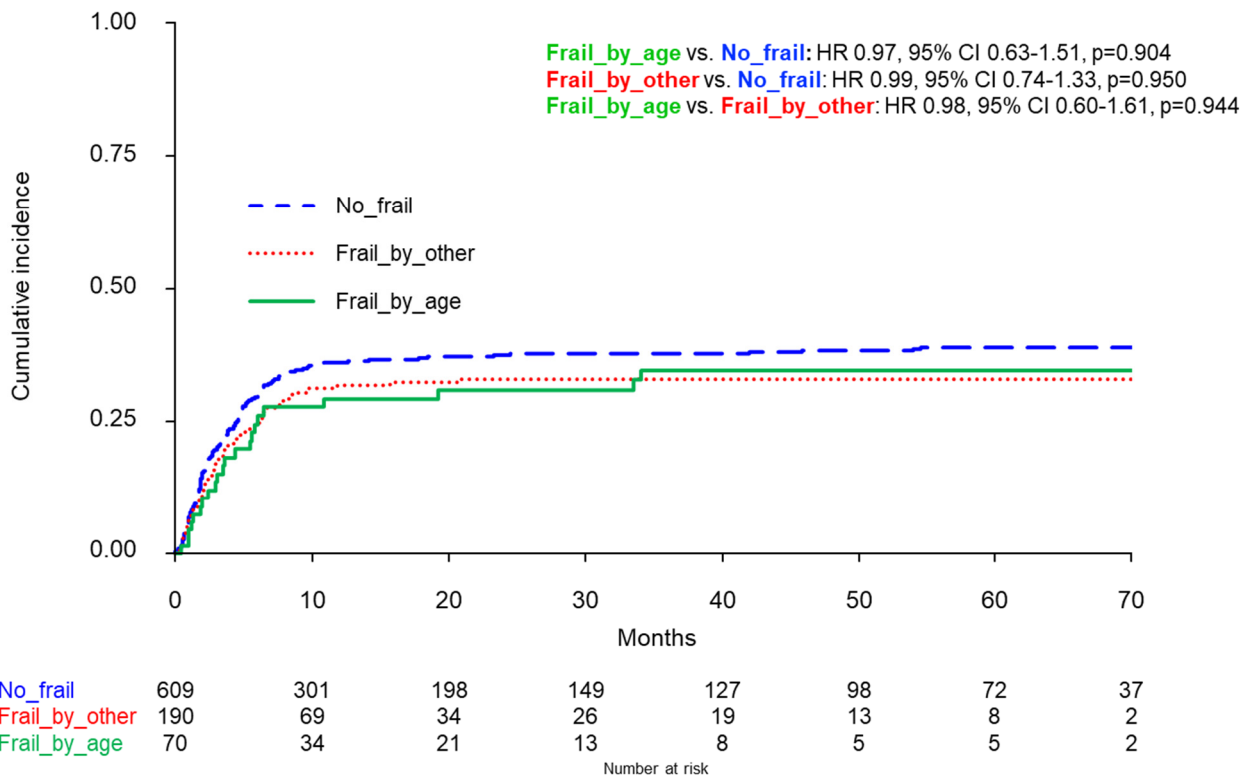

Abbreviations. HR, hazard ratio; CI, confidence interval; p, p-value.

**Figure S4.** OS of patients aged  $\leq 80$  years (A) and  $>80$  years (B) according to the presence or absence of geriatric impairments

**A. OS: age  $\leq 80$  years**

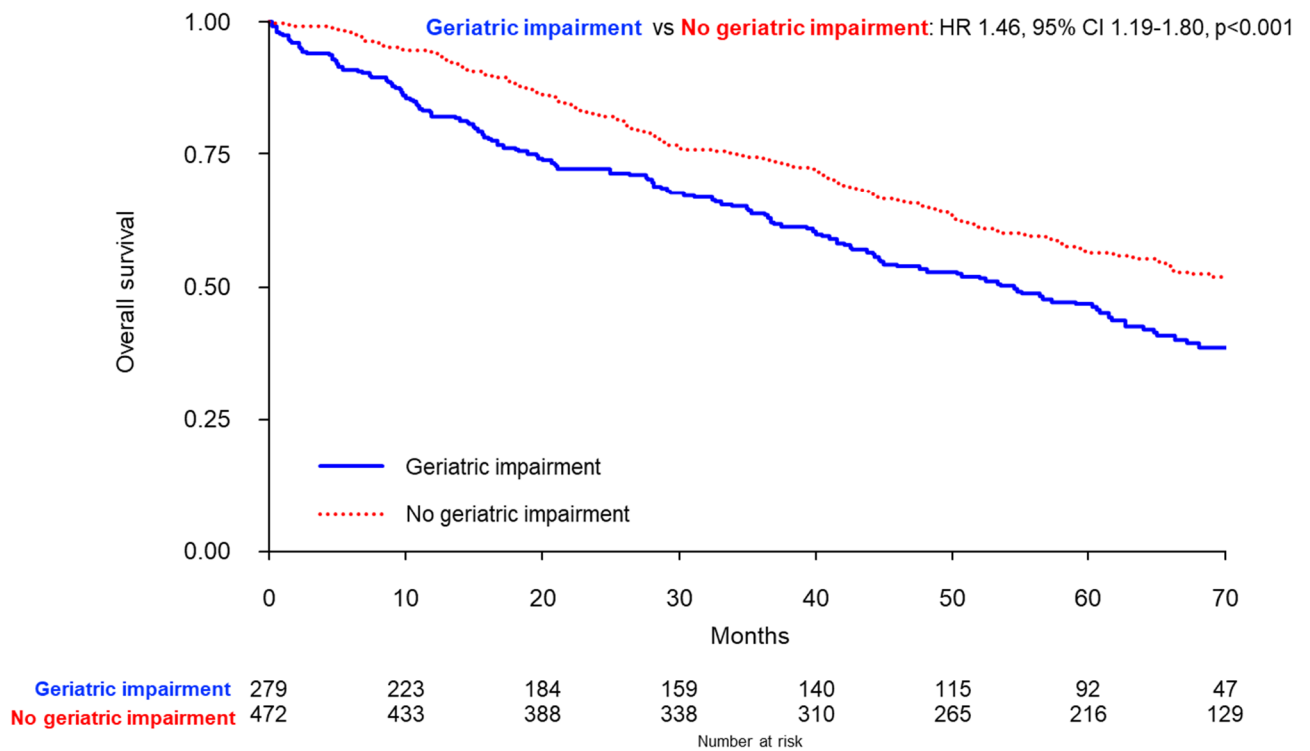

**B. OS: age  $>80$  years**

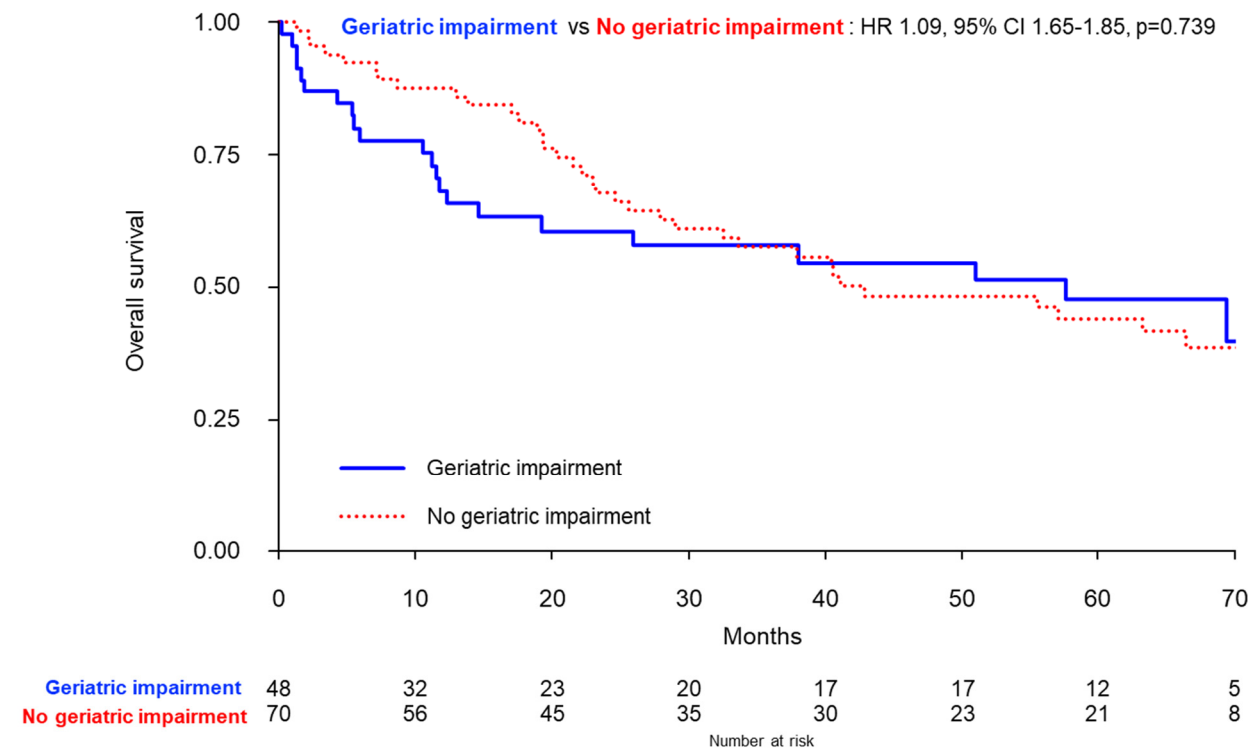

Abbreviations. OS, overall survival; HR, hazard ratio; CI, confidence interval; p, p-value.
